# Supplementary material for: Microbial Signatures in COVID-19: Distinguishing Mild and Severe Disease via Gut Microbiota
Source: Research Square preprint supplement (doi:10.21203/rs.3.rs-3341913/v1), 2023-10-03
Supplement: Supplementary file 2 [file b8abfe0f2786455e21addd5a.docx]

Table S1. Results of aligning ASV sequences to the nt database using BLASTN that overlap between the Deseq2 and Songbird tools.

| ASV | Genus | Group | Species Blast | p ident,% | Len | Study | Source |
| --- | --- | --- | --- | --- | --- | --- | --- |
| ASV29 | Enterococcus | severe | Enterococcus hirae  Enterococcus faecium | 100  100 | 2951512  2802719 | CP055232.1  AP022341.1 | Human  NO_INFO |
| ASV55 | Rothia | severe | Rothia mucilaginosa    Uncultured bacterium | 100  100 | 2292716  1348 | AP014938.1  AY979220.1 | Human Oral Cavity  human transverse colon mucosal biopsy |
| ASV60 | Akkermansia | severe | Akkermansia muciniphila | 100 | 3156561 | CP029753.1 | Korean adult feces |
| ASV62 | Agathobacter | severe | [Eubacterium] rectale | 100 | 3451485 | CP092643.1 | mouse models |
| ASV134 | Actinomyces | severe | Schaalia odontolytica  Schaalia odontolytica | 100  100 | 2360133  1462 | CP040006.1  MT275735.1 | human oral cavity  saliva |
| ASV822 | Alloprevotella | severe | Uncultured bacterium | 100 | 1388 | F843381.1 | human stool |
| ASV938 | Slackia | severe | Slackia isoflavoniconvertens  Uncultured  actinobacterium | 100  100 | 1188  1488 | MG597235.1  EF071271.1 | feces of child with autism spectrum disorder  human colonic mucosal biopsy |
| ASV1016 | Prevotella_9 | severe | Prevotella copri  Uncultured bacterium | 100  100 | 3325535  1364 | CP085932.1  JQ189980.1 | NO_INFO  human stool |
| ASV1444 | [Ruminococcus] gauvreauii group | severe | Uncultured bacterium  Blautia faecicola  Lachnospiraceae bacterium | 100  99.5  99.7 | 1355  1534  1470 | AY976254.1  NR_170495.1  OK510349.1 | human ascending colon mucosal biopsy  feces  feces |
| ASV1564 | Eubacterium | severe | Eubacterium limosum | 100 | 4422837 | CP019962.1 | Human intestinal content |
| ASV1629 | Enterococcus | severe | Enterococcus faecium  Enterococcus faecium  Enterococcus hirae | 100  99.7  99.7 | 1524  2802719  2951512 | FJ378694.1  AP022341.1  CP055232.1 | NO_INFO  NO_INFO  Human |
| ASV1650 | Eisenbergiella | severe | Eisenbergiella tayi  Uncultured bacterium | 100  100 | 1406  1393 | LC515631.1  DQ823884.1 | Human feces  human feces |
| ASV2021 | Christensenellaceae R-7 group | severe | Uncultured bacterium clone | 100 | 1405 | DQ806575.1 | human feces |
| ASV4 | Veillonella | mild | Veillonella dispar  Veillonella nakazawae  Veillonella sp | 100  100  100 | 2116915  2097818  1497 | LR134375.1  AP022321.1  OK510322.1 | Mouth  oral cavity  feces |
| ASV14 | Haemophilus | mild | Haemophilus parainfluenzae  Haemophilus parainfluenzae | 100  100 | 2067650  1462 | CP035368.2  MW647719.1s | Urethral swab  subgingival plaque, periodontitis |
| ASV35 | Atopobium | mild | Uncultured organism  Atopobium parvulum | 100  99.5 | 1431  1543805 | HQ788150.1  CP001721.1 | gastrointestinal specimens  NO_INFO |
| ASV50 | ASV50_CAG-352 | mild | Ruminococcoides bili  Ruminococcus sp  Uncultured bacterium | 100  100  100 | 1588  1467  1520 | NR_173642.1  MZ573208.1  DQ905838.2 | bile  fecal sample  Homo sapiens fecal sample |
| ASV52 | Streptococcus | mild | Streptococcus gordonii  Streptococcus gordonii | 100  100 | 2196595  1479 | CP046328.1  MW617357.1 | NO_INFO  chronic periodontitis |
| ASV177 | Romboutsia | mild | Romboutsia ilealis | 100 | 2581778 | LN555523.1 | NO_INFO |
| ASV202 | Alistipes | mild | Alistipes putredinis | 100 | 1490 | LT223618.1 | Human stool |
| ASV284 | Bacteroides | mild | Bacteroides vulgatus | 100 | 1449 | JN084208.2 | human feces |
| ASV277 | Prevotella9 | mild | Prevotella copri  Prevotella copri | 100  100 | 3748729  1430 | CP042464.1  OM004003.1 | feces  feces |
| ASV347 | Prevotella9 | mild | Prevotella copri | 100 | 3748729 | CP042464.1 | feces |
| ASV545 | Lachnospiraceae NK4A136 | mild | Lachnospiraceae bacterium sunii NSJ-8 | 100 | 3572951 | CP060633.1 | feces |
| ASV773 | Bacteroides | mild | Bacteroides stercoris  Bacteroides stercoris | 99.7  100 | 3883826  1363 | CP081913.1  LC515634.1 | feces  Human feces |
| ASV1277 | Bacteroides | mild | Uncultured bacterium  Phocaeicola sp  Bacteroides massiliensis | 100  100  99.7 | 1493  1465  1369 | EF405474.1  OK326065.1  LC515611.1 | human fecal  Human feces  Human feces |
| ASV1326 | Blautia | mild | Uncultured bacterium  Blautia faecis | 100  99.7 | 1390  1341 | DQ796291.1  LC515565.1 | human feces  human feces |
| ASV1642 | Anaerostipes | mild | Uncultured bacterium  Anaerostipes hadrus | 100  99.7 | 1491  1339 | GQ898540.1  LC515619.1 | feces from human  Human feces |
| ASV1797 | [Eubacterium] xylanophilum group | mild | Uncultured bacterium  Eubacterium sp. | 100  100 | 1510  1422 | EF404908.1  AJ409006.1 | Human feces  NO_INFO |
| ASV1827 | Anaerostipes | mild | Anaerostipes hadrus  Uncultured bacterium | 99.8  100 | 3172613  1397 | LR699012.1  DQ806249.1 | human gut  human feces |
| ASV1925 | Paraprevotella | mild | Uncultured bacterium | 100 | 1524 | KF842645.1 | fecal sample |
| ASV2019 | Turicibacter | mild | Turicibacter sp.  Turicibacter sanguinis | 100  100 | 2622031  1381 | CP013476.1  LC515561.1 | feces  Human feces |
| ASV2362 | Blautia | mild | Blautia sp | 100 | 1469 | OK326028.1 | Human feces |

Table S2. The results of aligning ASV sequences on nt database using BLASTN, ASV’s that aligned to the same species were bolded.

| ASV | Genus | Group | Species Blast | Tool | p ident,% | Len | Study | Source |
| --- | --- | --- | --- | --- | --- | --- | --- | --- |
| **ASV1870** | **[Eubacterium] hallii group** | **mild** | **Uncultured bacterium clone**  **Anaerobutyricum hallii** | **Deseq2** | **100**  **99.7** | **1389**  **3434948** | **DQ795967.1**  **CP073280.1** | **Human**  **NO_INFO** |
| **ASV1360** | **[Eubacterium] hallii group** | **mild** | **Uncultured bacterium clone**  **Anaerobutyricum hallii** | **Sonbird** | **100**  **99.7** | **1389**  **3434948** | **DQ795967.1**  **CP073280.1** | **Human**  **NO_INFO** |
| **ASV1494** | **[Eubacterium] ventriosum group** | **mild** | **Eubacterium ventriosum** | **Deseq** | **100** | **1348** | **LC515582.1** | **Human feces** |
| **ASV556** | **[Eubacterium] ventriosum group** | **mild** | **Eubacterium ventriosum** | **Songbird** | **99.5** | **1348** | **LC515582.1** | **Human feces** |
| **ASV707** | **Faecalibacterium** | **mild** | **Faecalibacterium prausnitzii** | **Deseq2** | **100** | **2970937** | **CP030777.1** | **NO_INFO** |
| **ASV998** | **Faecalibacterium** | **mild** | **Faecalibacterium prausnitzii** | **Songird** | **100** | **1390** | **MF186166.1** | **feces** |
| ASV1206 | Alistipes | mild | Alistipes shahii | Deseq2 | 100 | 1486 | LT223619.1 | Human stool |
| ASV2121 | Alistipes | mild | Alistipes ihumii | Deseq2 | 100 | 1494 | NR_144706.1 | feces |
| ASV427 | Alistipes | mild | Alistipes communis | Songird | 100 | 3302129 | AP019739.1 | feces |
| ASV1429 | Alistipes | mild | Alistipes dispar | Songird | 100 | 2962376 | AP019736.1 | feces |
| ASV360 | Bifidobacterium | mild | Bifidobacterium dentium | Deseq2 | 100 | 2635828 | LR134349.1 | Dental caries |
| ASV506 | Bifidobacterium | mild | Bifidobacterium catenulatum    Bifidobacterium pseudocatenulatum | Songird | 100  100 | 2445409  2313752 | CP026729.1  AP012330.1 | infant feces  NO_INFO |
| ASV485 | Parabacteroides | mild | Parabacteroides merdae | Deseq2 | 100 | 4375800 | CP085927.1 | NO_INFO |
| ASV1037 | Parabacteroides | mild | Parabacteroides sp.  Parabacteroides distasonis | Songird | 100  99.7 | 5372666  1497 | CP022754.1  NR_074376.1 | feces  NO_INFO |
| **ASV949** | **Prevotella _9** | **mild** | **Prevotella copri** | **Deseq2** | **100** | **3325535** | **CP085932.1** | **NO_INFO** |
| **ASV1067** | **Prevotella _9** | **mild** | **Prevotella copri** | **Songird** | **100** | **1493** | **NR_113411.1** | **NO_INFO** |
| ASV1163 | Prevotella _9 | mild | Uncultured bacterium | Songbird | 100 | 1385 | FJ509126.1 | intestinal mucosal biopsy from ulcerative colitis patient |

Table S3. Network characteristics for mild and severe groups of SARS-CoV-2 infected patients.

|  | mild group | severe group |
| --- | --- | --- |
| Number of components | 169.000 | 131.000 |
| Relative LCC size | 0.080 | 0.275 |
| Clustering coefficient | 0.155 | 0.038 |
| Modularity | 0.532 | 0.747 |
| Positive edge percentage | 82.759 | 85.714 |
| Edge density | 0.097 | 0.025 |
| Natural connectivity | 0.051 | 0.013 |
| Vertex connectivity | 1.000 | 1.000 |
| Edge connectivity | 1.000 | 1.000 |

Table S4. Keytaxa taxa (nodes with a centrality value above the empirical 95% quantile) are associated with mild and severe groups.

| ASV | Genus | Group | Species Blast | p ident,% | Len | Study |
| --- | --- | --- | --- | --- | --- | --- |
| ASV432 | Dorea | mild | Dorea formicigenerans | 100 | 3188304 | CP102279.1 |
| ASV372 | Blautia | mild | Blautia obeum | 100 | 3757491 | FP929054.1 |
| ASV387 | Coprococcus | mild | Coprococcus comes | 100 | 3373067 | CP070062.1 |
| ASV655 | UCG005 | mild | uncultured bacterium | 100 | 1524 | AB506393.1 |
| ASV2222 | Lachnospiraceae FCS020 group | severe | Lachnospiraceae bacterium | 100 | 1492 | MH699349.1 |
| ASV1365 | Lachnospiraceae FCS020 group | severe | Lachnospiraceae bacterium | 100 | 1467 | OK510298.1 |
| ASV2294 | Lachnospiraceae FCS020 group | severe | Jingyaoa shaoxingensis  uncultured bacterium | 100 | 1401  1490 | NR_181397.1  GQ897834.1 |
