# Supplementary material for: Microbial Signatures in COVID-19: Distinguishing Mild and Severe Disease via Gut Microbiota
Source: Research Square preprint supplement (doi:10.21203/rs.3.rs-3341913/v1), 2023-10-03
Supplement: Supplementary file 3 [file e2536c73fe3f5b65437ec219.docx]

**Supplementary Information**

Additional file 1:

Figure S1. Data preprocessing scheme.

Figure S2. Heatmap showing the abundance of 313 ASVs in patients with COVID-19. Read abundance is CLR normalized

Figure S3. (A)The results of DMM (Dirichlet Multinomial Mixtures) clustering of RPKM values were obtained for each sample. Clustering was performed using DirichletMultinomial package in R. Model fit was evaluated using Laplace approximation (shown in pink), AIC (Akaike Information Criterion, shown in orange), and BIC (Bayesian Information Criterion, shown in blue). All three metrics clearly drop at (k=2), indicating that samples can be split into 2 clusters. (B-I) Distribution of metadata by comparison number of clusters (com_type2 variable)

Figure S4. The differentially abundant taxa testing associations. (A) Bacteria on the ASV level differ in abundance in patients from severe and mild groups. The analysis was carried out using the DeSeq2 method. Bacteria that are more abundant in more severe patients are shown in bars pointing to the right, and in milder patients - to the left. Asterisks indicate the level of significance with the following thresholds: (*) = 0.1, (**) = 0.05, (***) = 0.01. (B) Top ASVs that are associated with COVID-19 severity as analyzed by the Songbird utility. ASVs associated with a milder course of COVID-19 have lower differential values, with a more severe one - larger ones. The phylum is marked in color

Figure S5. The Venn diagram illustrates the shared taxa identified by Deseq2 and Songbird utilities in the severe (A) and mild (B) patient groups.

**Additional file 2:**

Table S1. Results of aligning ASV sequences to the nt database using BLASTN that overlap between the Deseq2 and Songbird tools.

Table S2. The results of aligning ASV sequences on nt database using BLASTN, ASV’s that aligned to the same species were bolded.

Table S3. Network characteristics for mild and severe groups of SARS-CoV-2 infected patients.

Table S4. Keytaxa taxa (nodes with a centrality value above the empirical 95% quantile) are associated with mild and severe groups.
