# Supplementary figures and images for: Microbial Signatures in COVID-19: Distinguishing Mild and Severe Disease via Gut Microbiota
Source: Research Square preprint supplement (doi:10.21203/rs.3.rs-3341913/v1), 2023-10-03

Figure S1

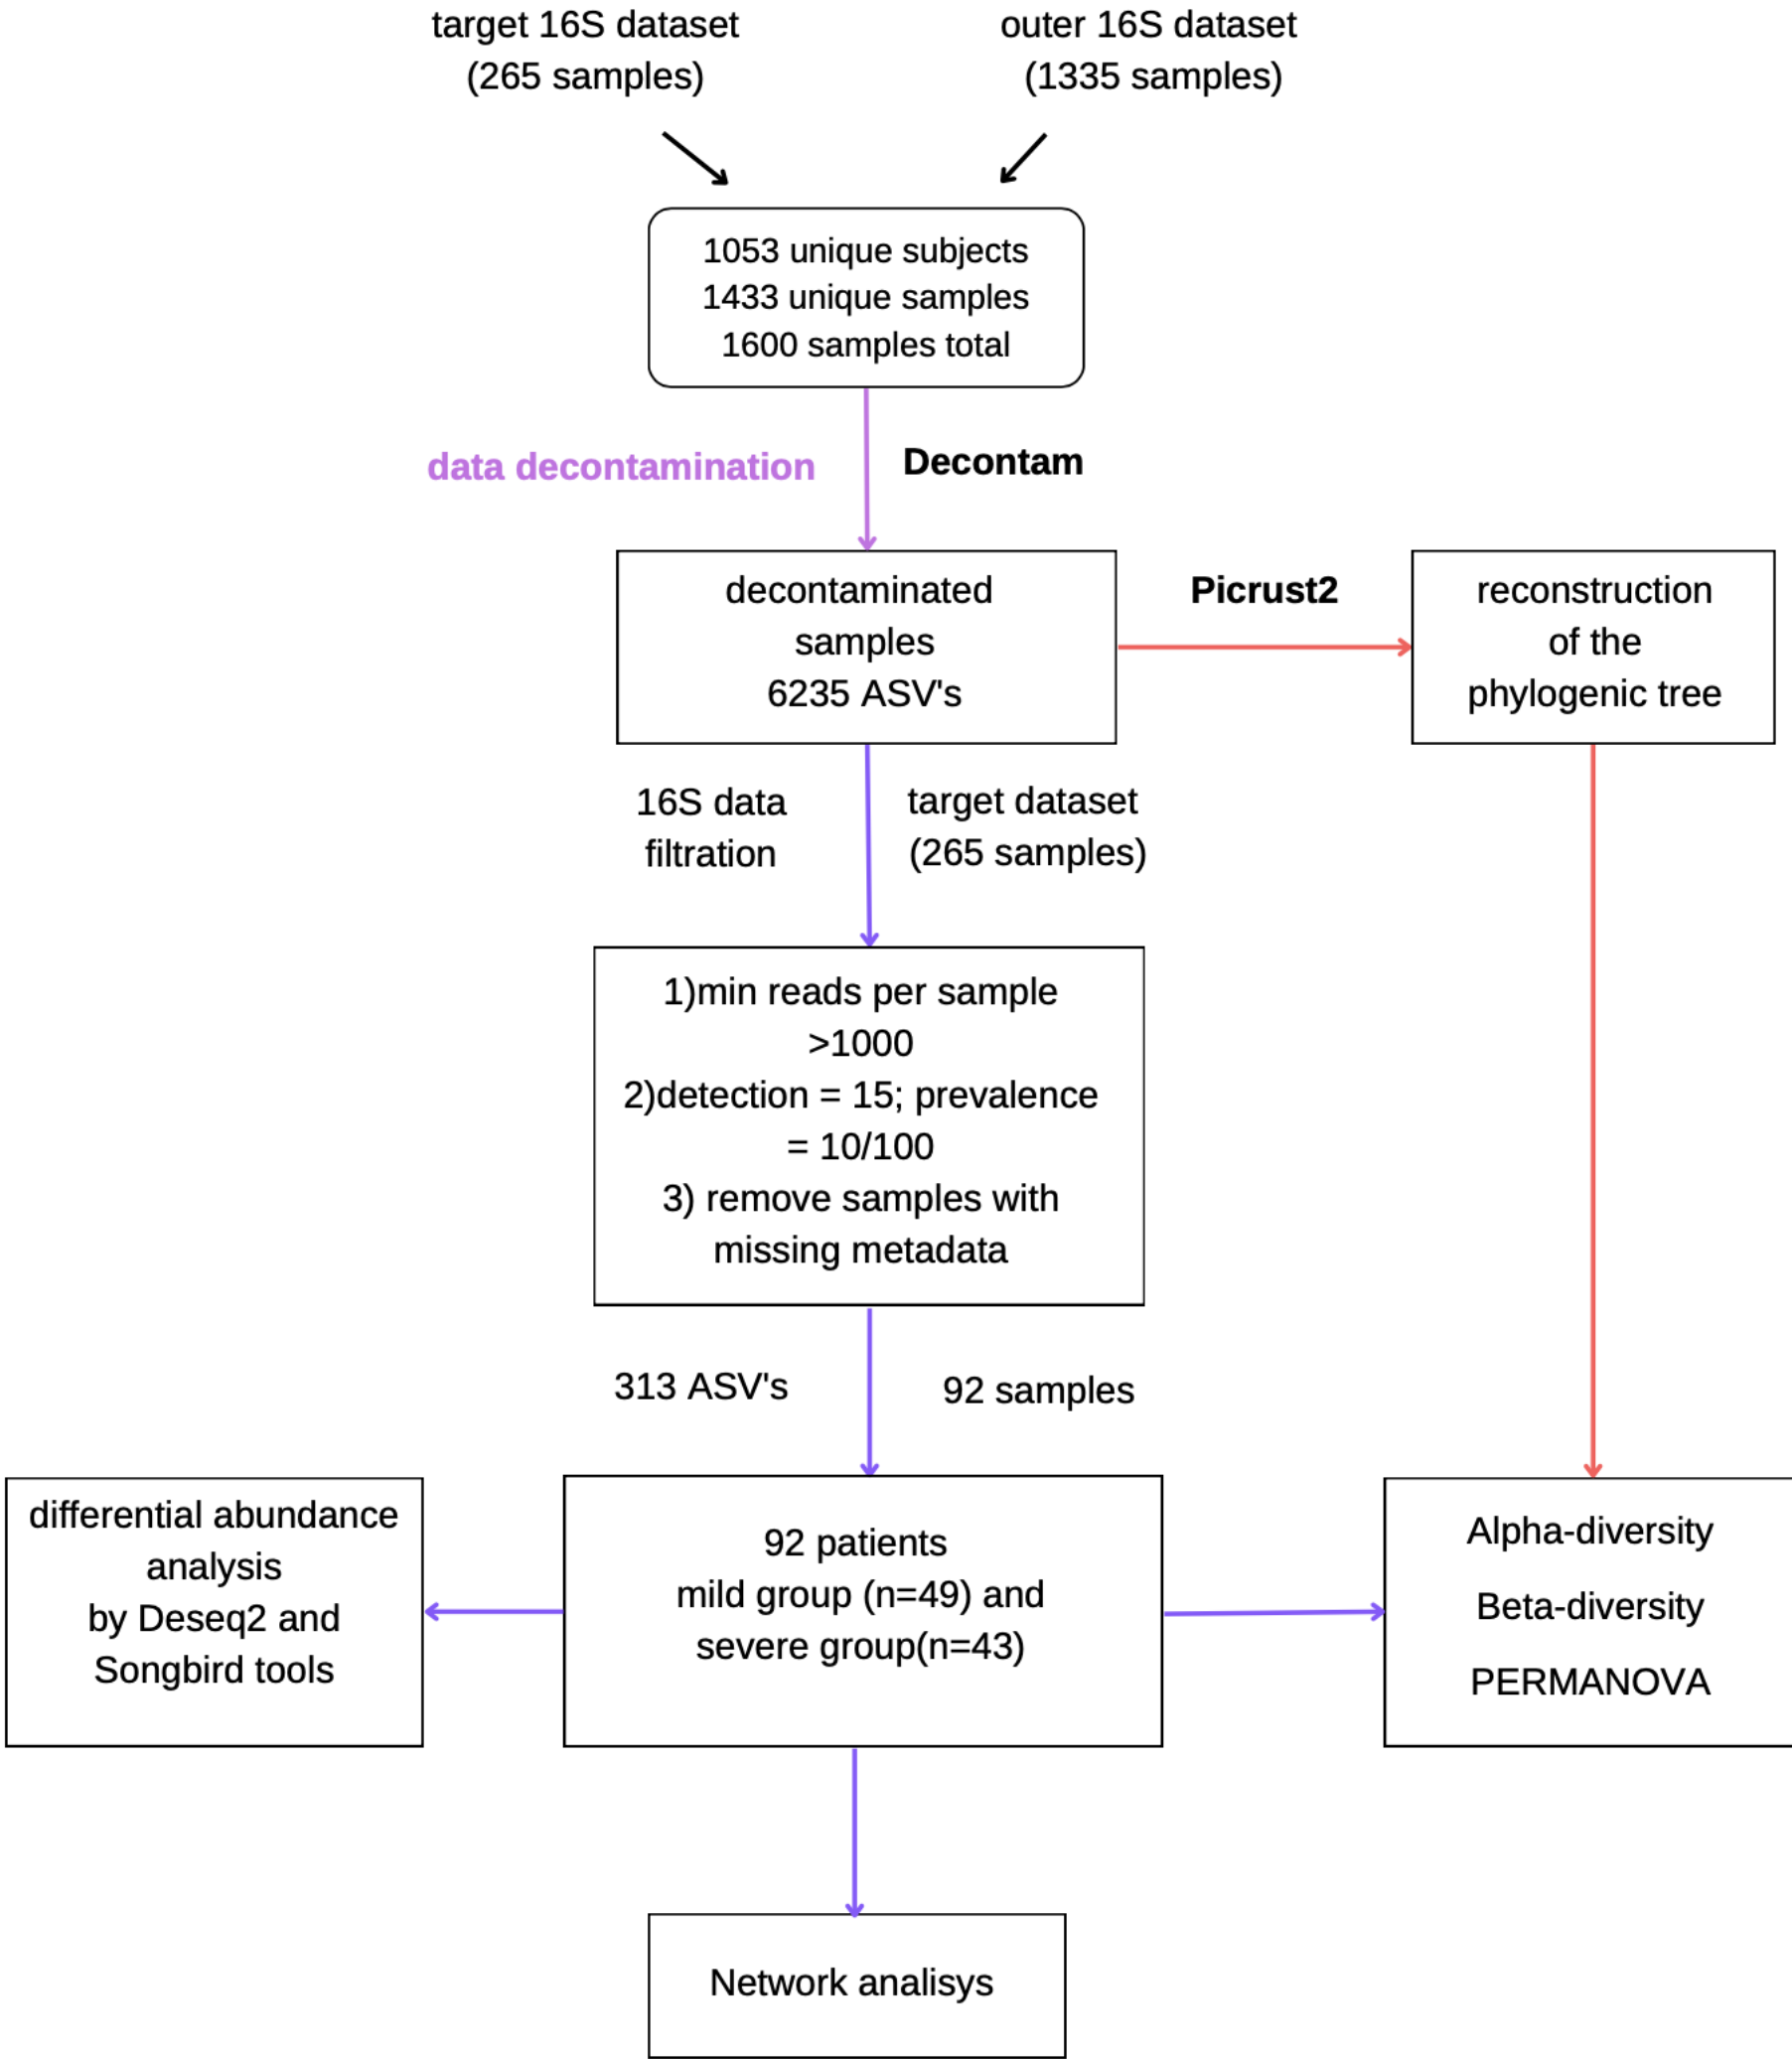

Figure S2

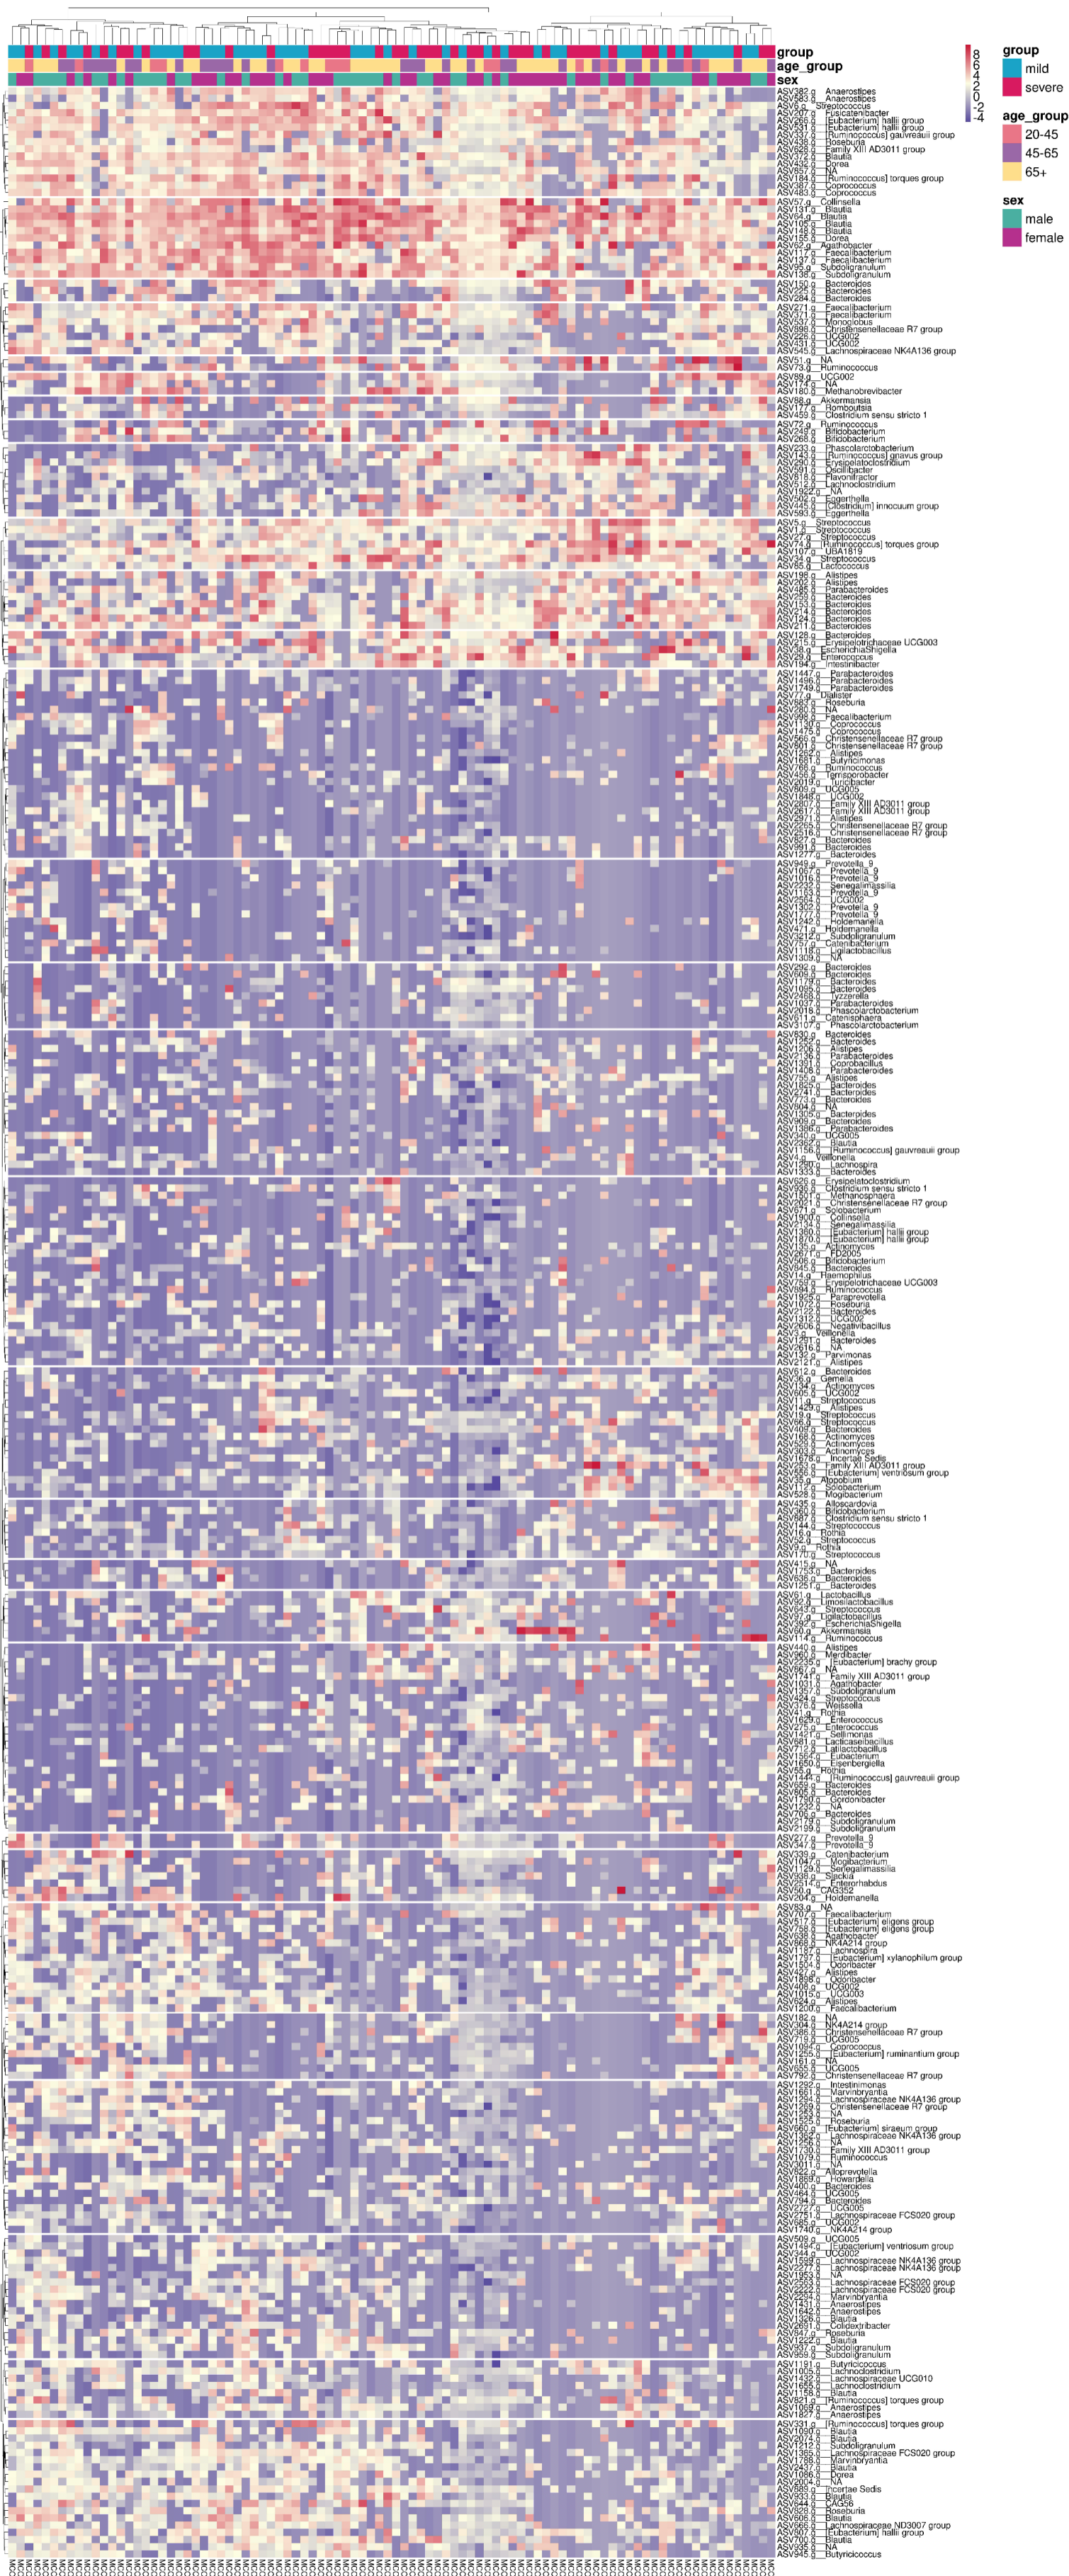

Figure S3

A

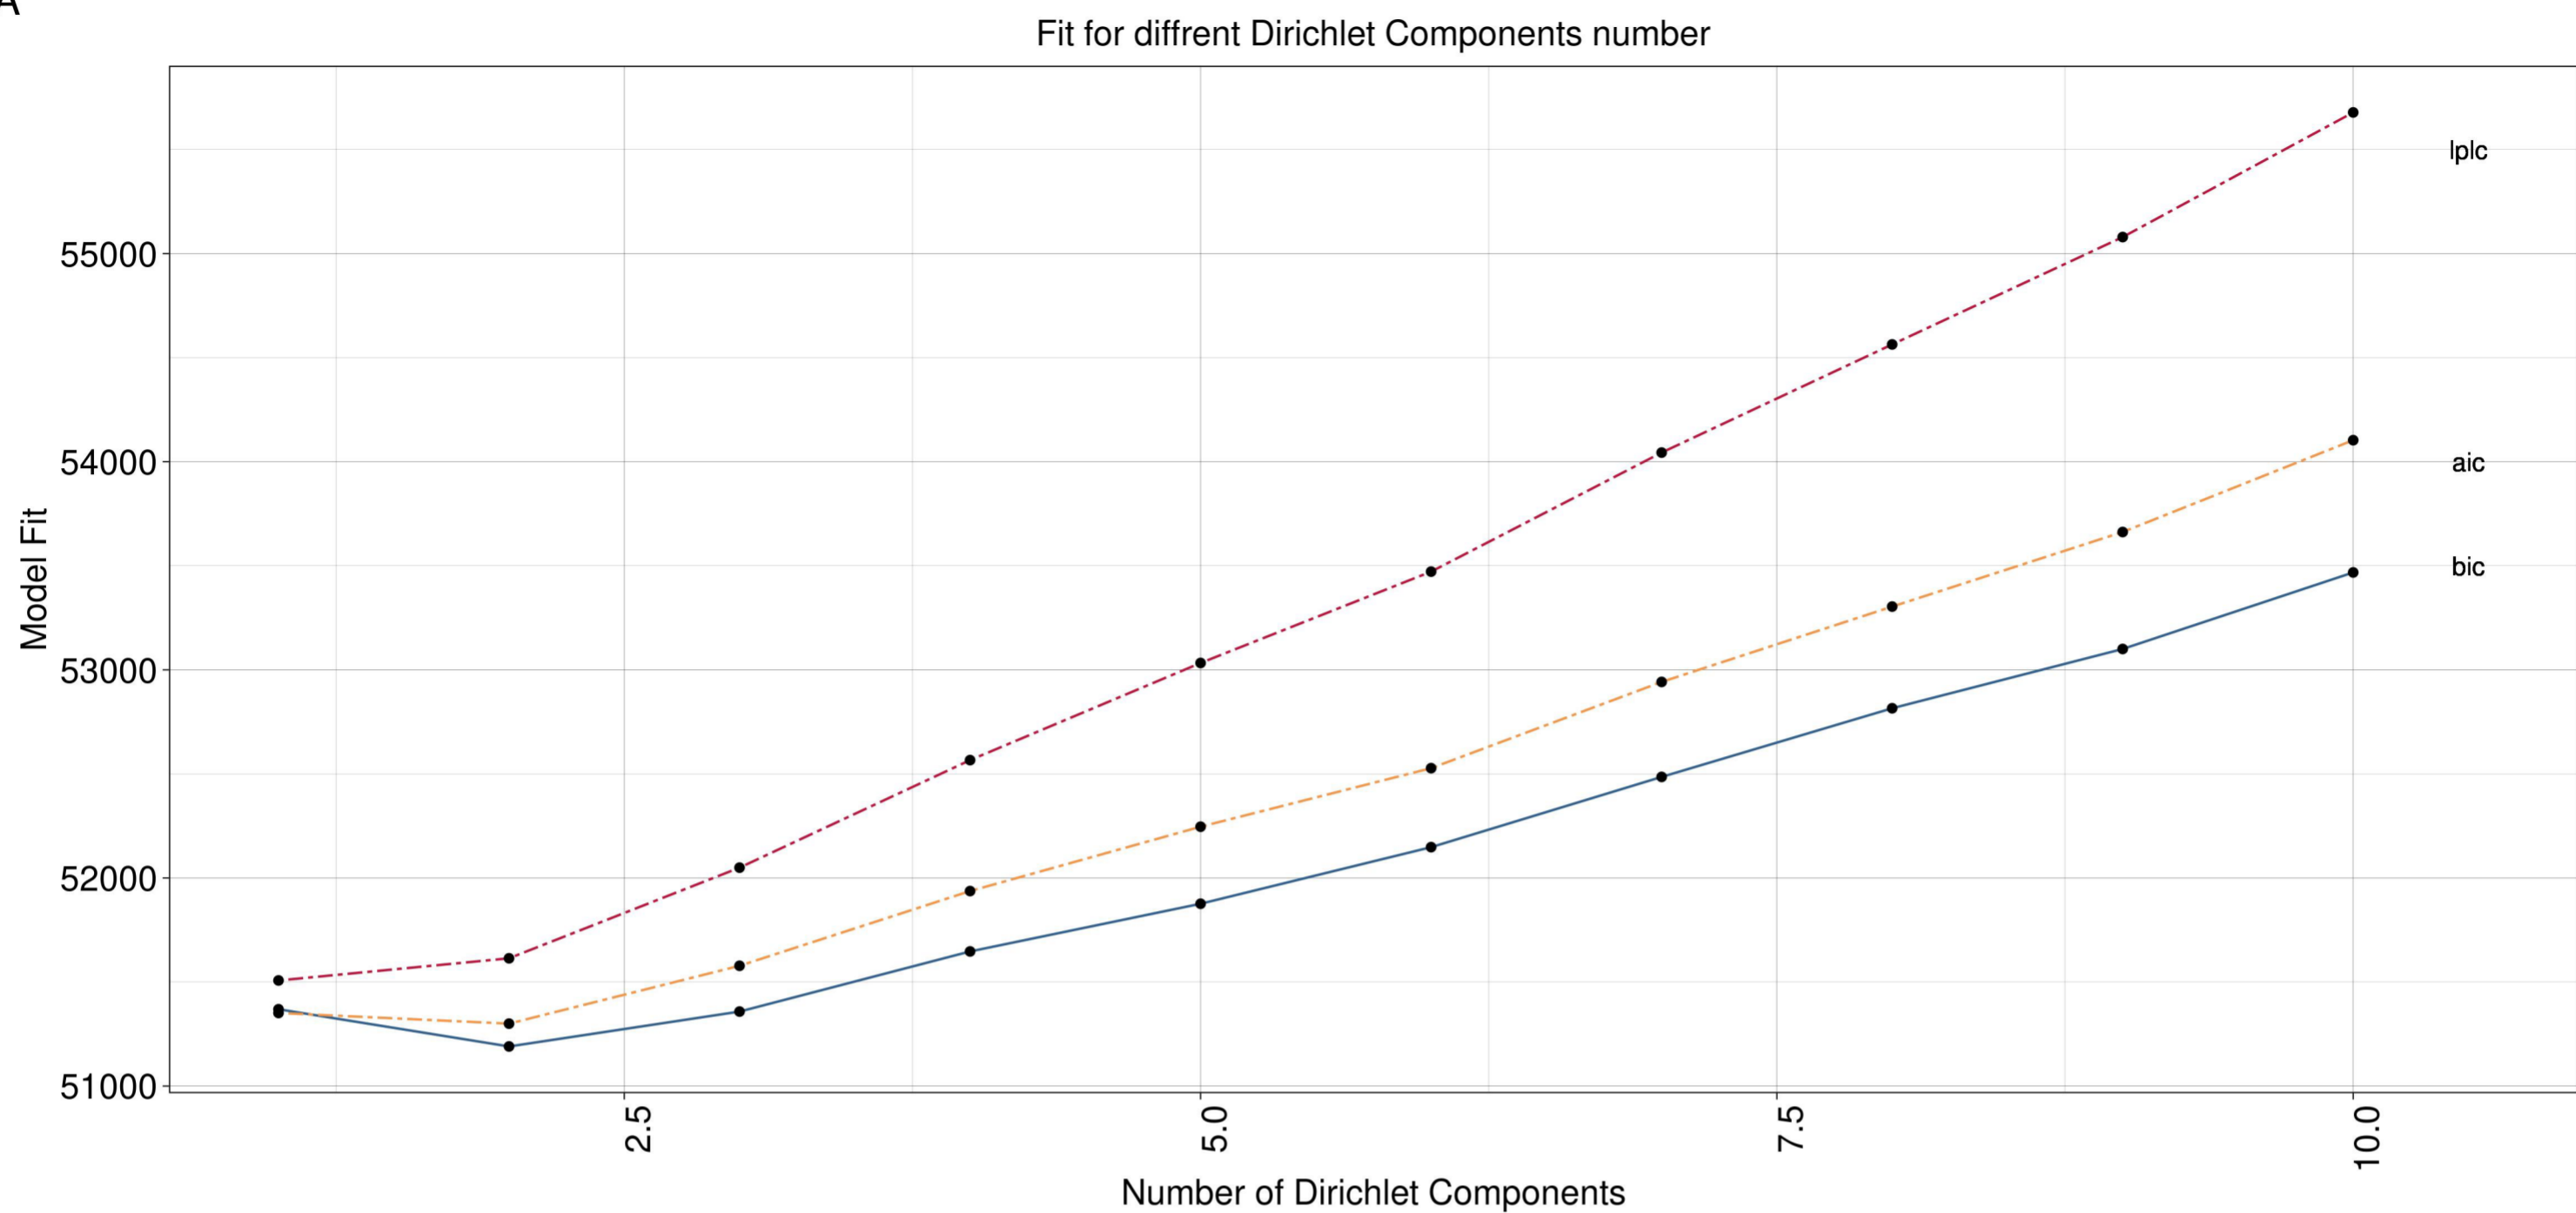

B

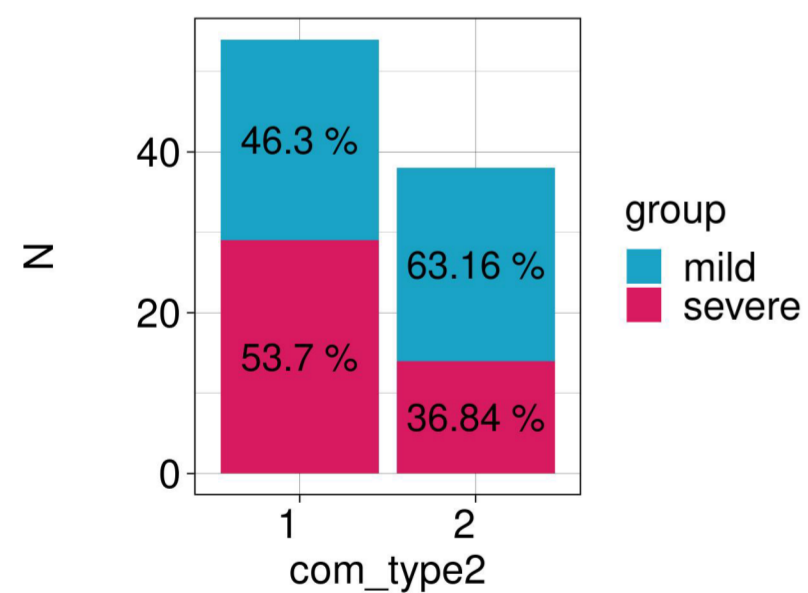

C

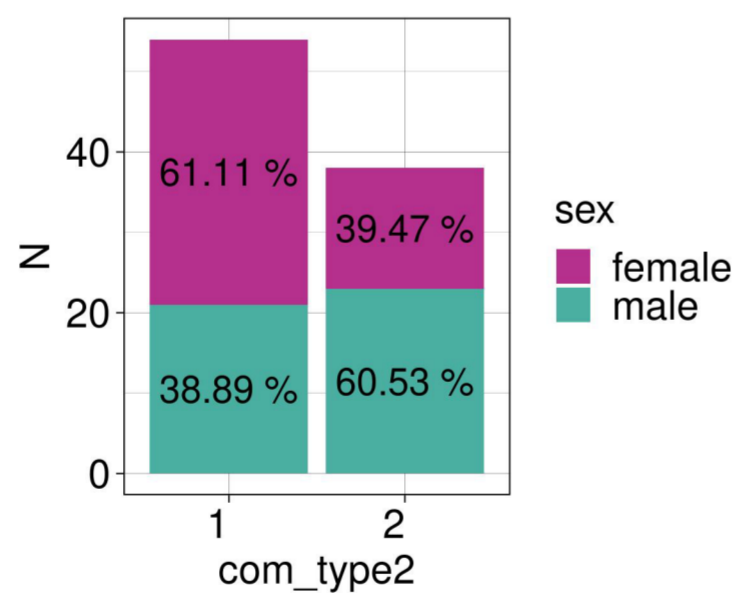

D

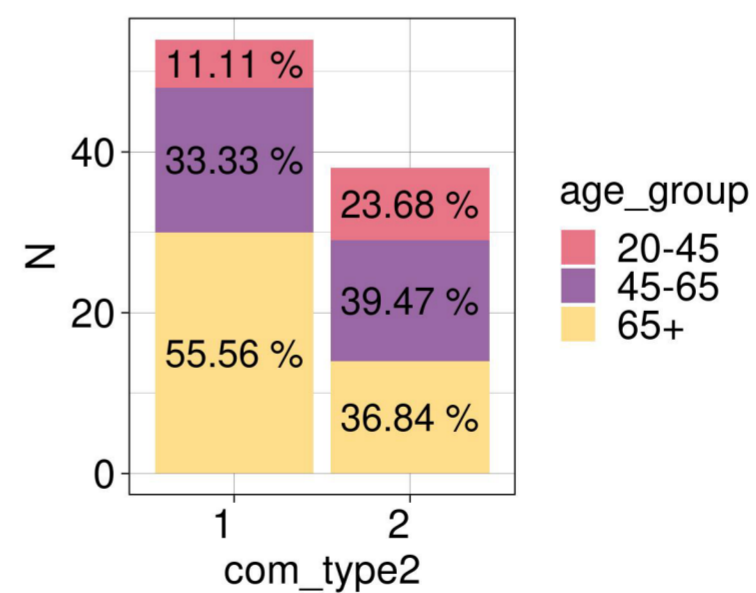

E

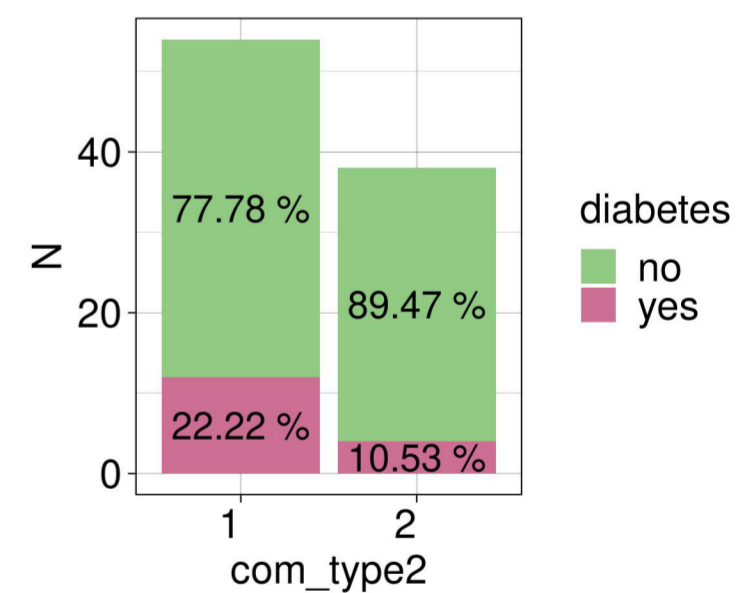

F

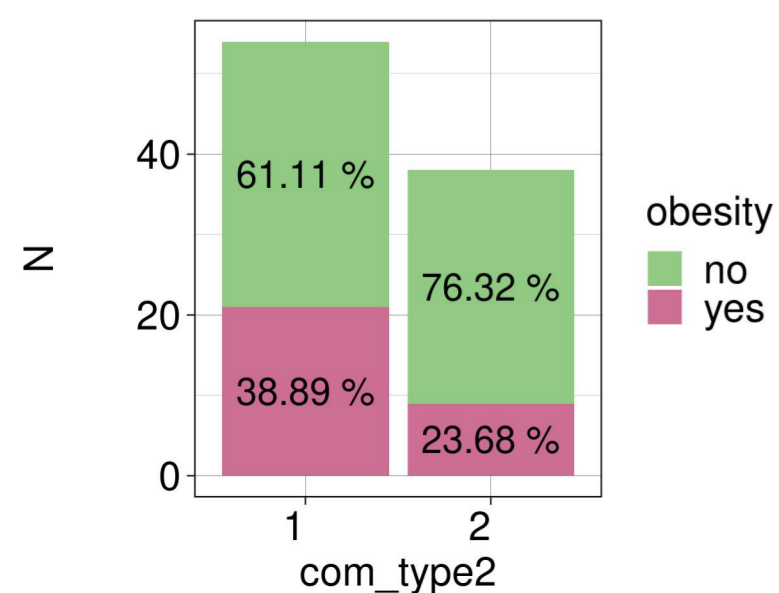

G

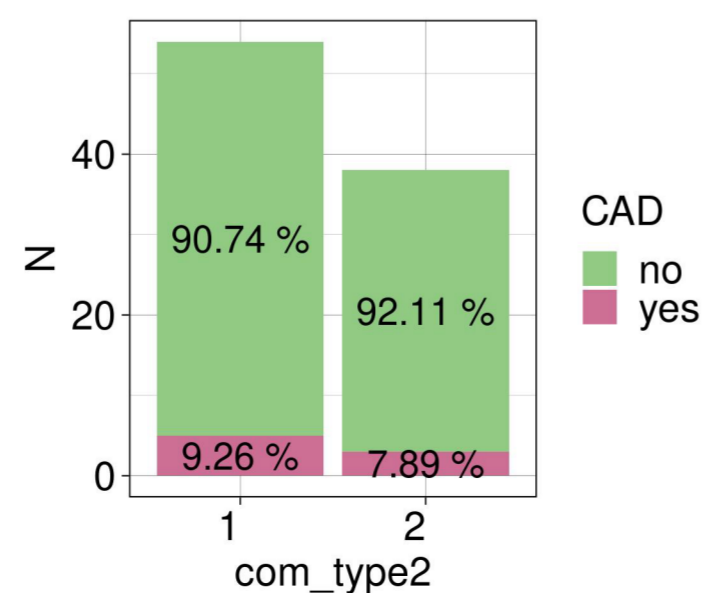

H

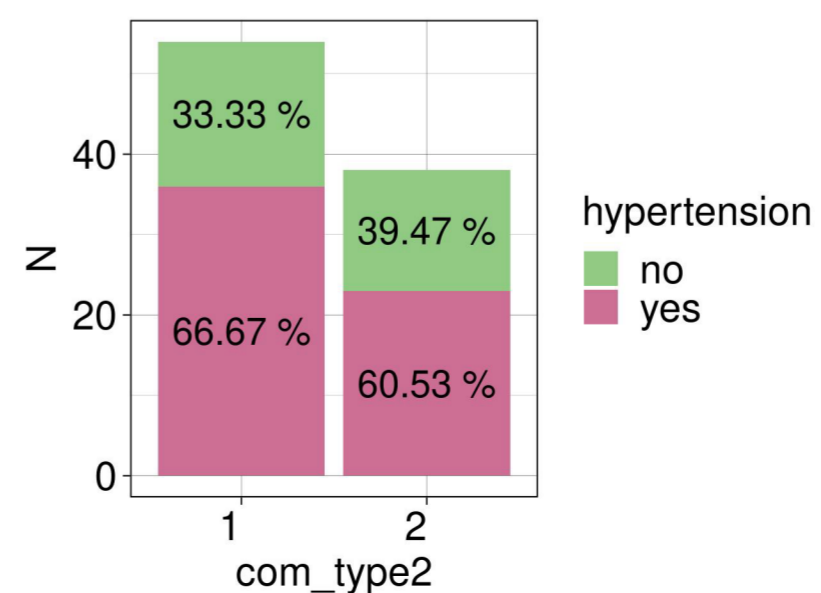

I

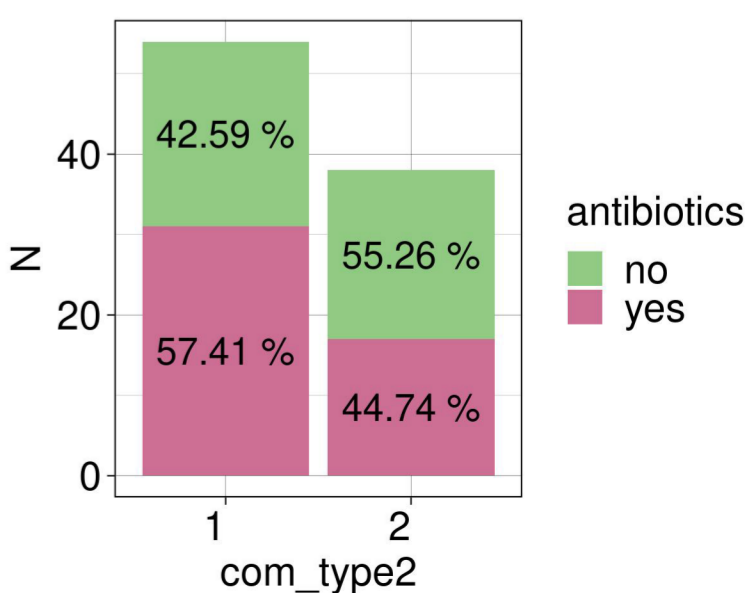

Figure S4

A

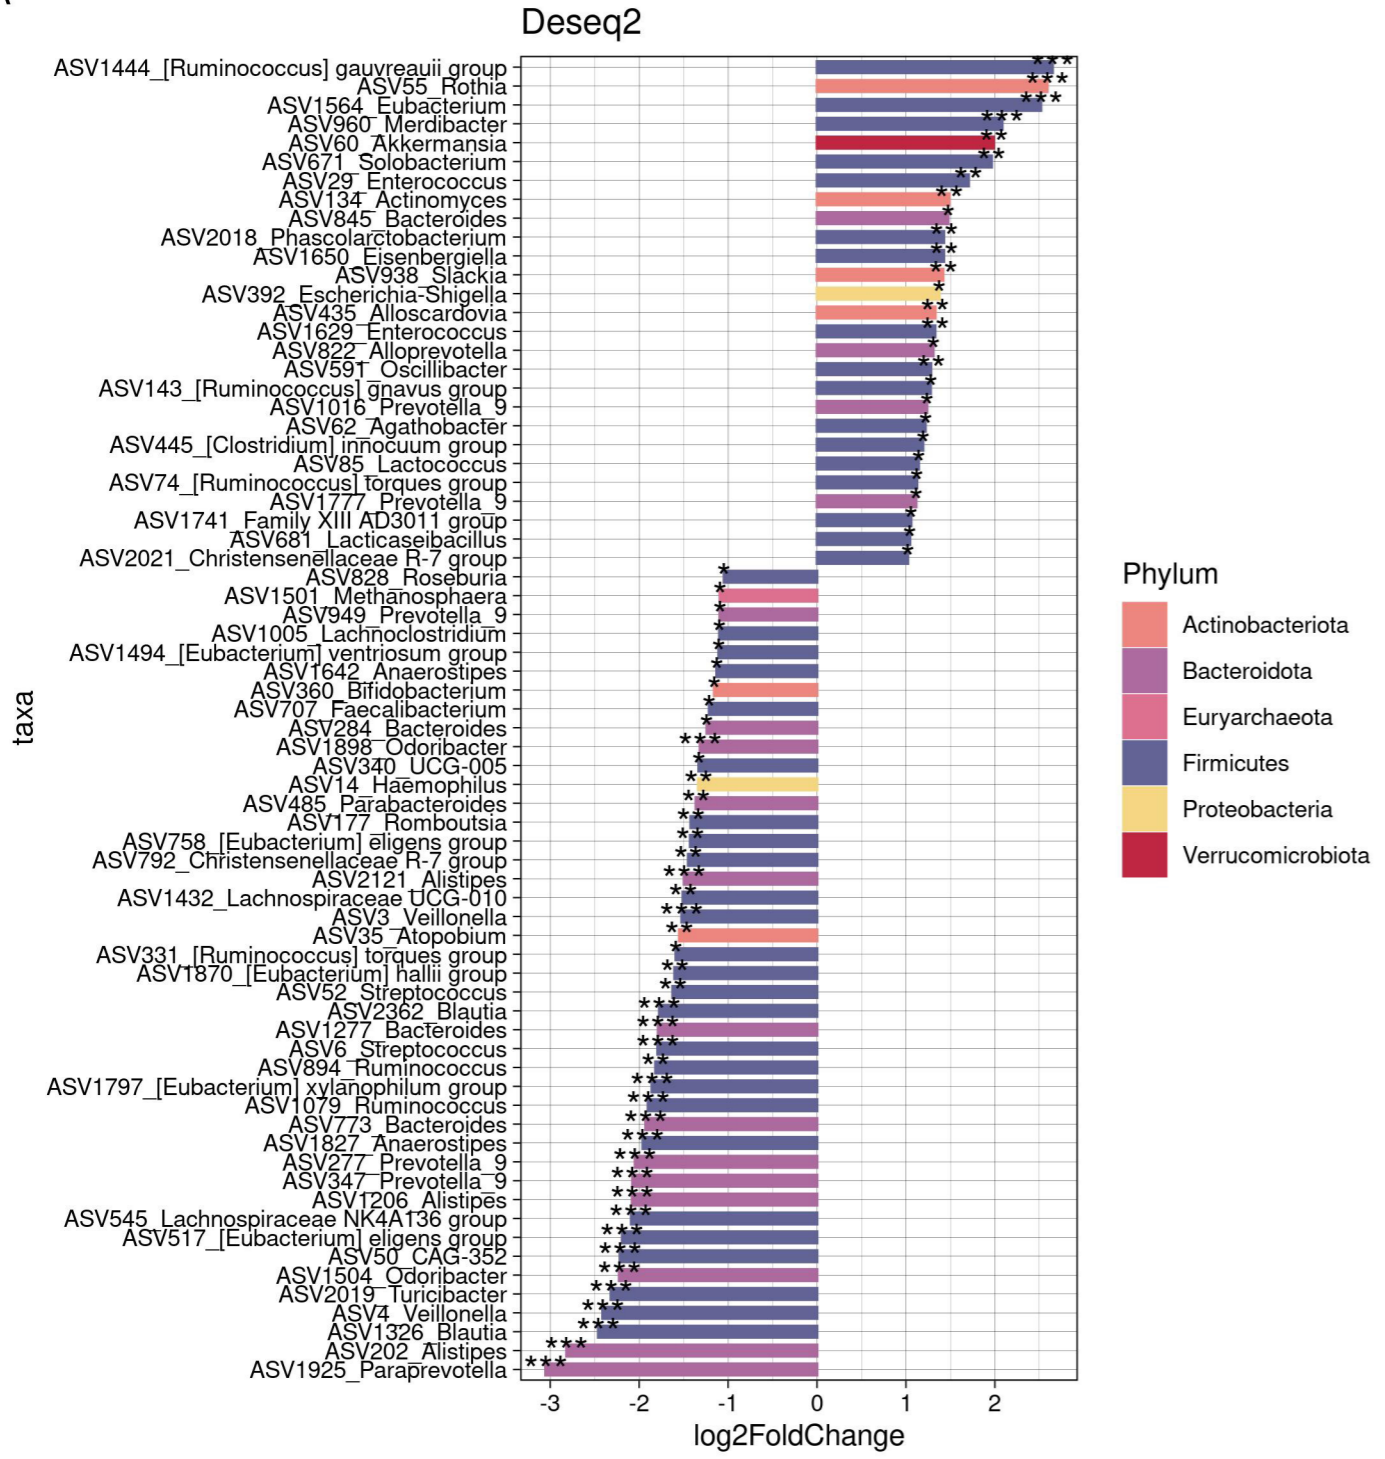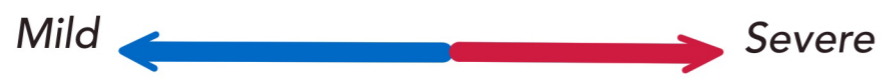

B

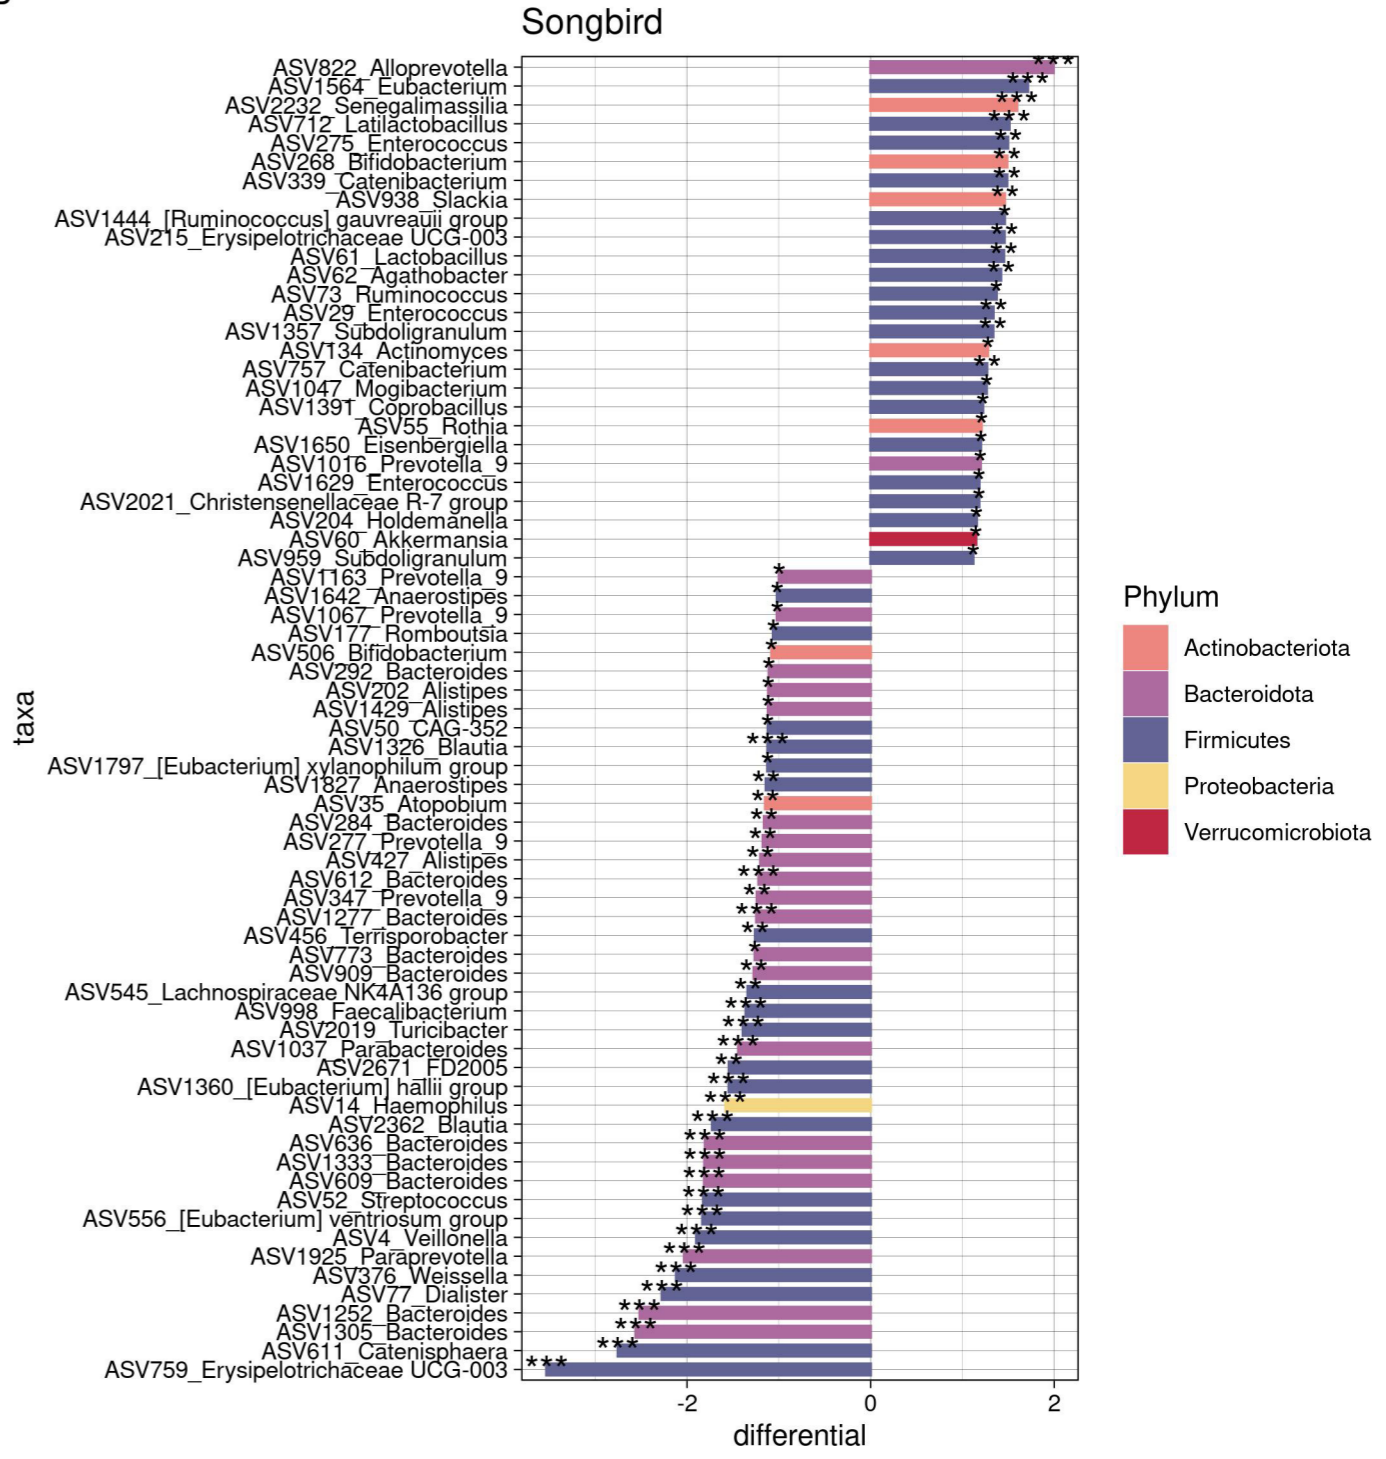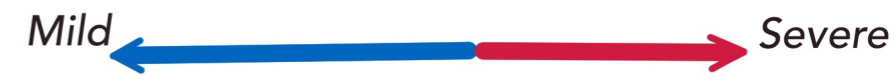

# Figure S5

A

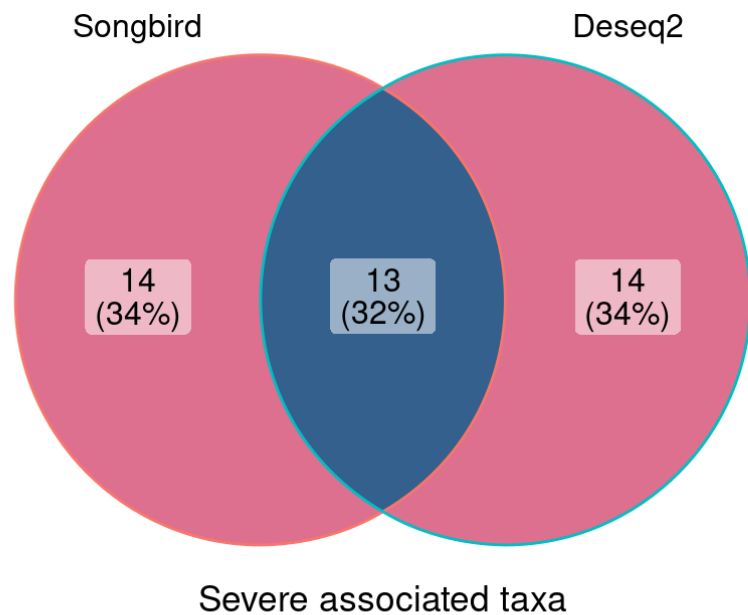

B

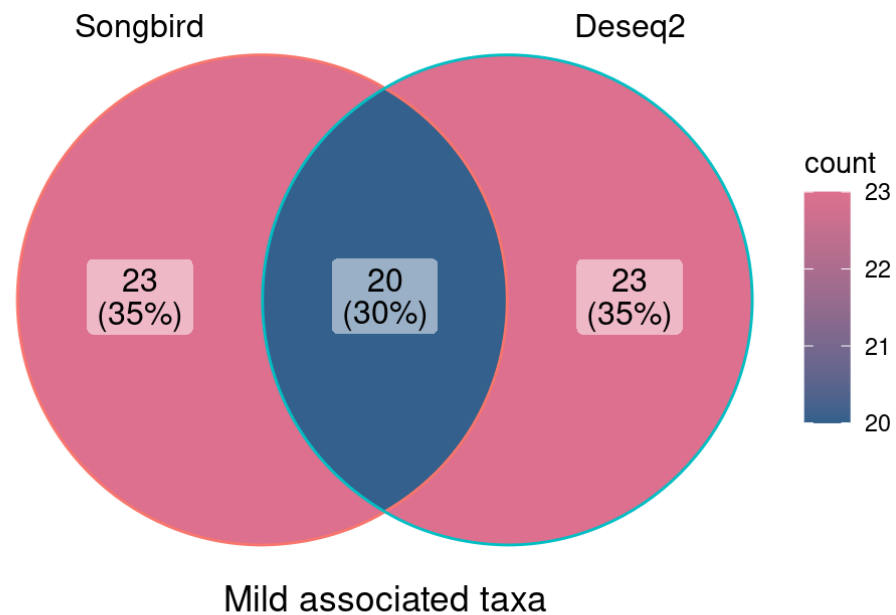

Supplement: Supplementary file 1 [file b04bcd932f1d05ea91e2ca12.pdf]
